# Supplementary material
Source: PubMed Central journal article supplement (PMC5137784)
Supplement: NIHMS70524-supplement-Supplementary_Figures_and_Tables.pdf [file NIHMS70524-supplement-Supplementary_Figures_and_Tables.pdf]

**Supplementary Figure 1.** Mutant library design.

**A, B.** Uniform coverage of mutations along synthetic genes in the small library (**A**) and big library (**B**).

**C.** Distributions of the number of single nucleotide substitutions per gene (upper panels) and of substitutions+deletions+insertions per gene (lower panels) in the two mutant libraries.

**Supplementary Figure 2.** Complementation of D343 strain with U3.

Growth of D343 cells supplemented with wild-type U3 (top panels), empty plasmid (middle panels) or a non-functional mutant of U3 (mutation list: C43T, C75G, A169C, G202T, G248C, C252T, C259T, G282T, A293T, T302A, G302A, G305del; bottom panels) on glucose and galactose media without adenine.

**Supplementary Figure 3.** Reproducibility of fitness measurements.

**A.** Reproducibility of fitness measurements for individual barcodes in experiments

Small\_1\_30C\_Glu (X axis) and Small\_3\_30C\_Glu (Y axis).  $R=0.78$ .

**B.** Reproducibility of mean fitness per site ( $f_i$ ) in experiments Small\_1\_30C\_Glu (X axis) and Small\_3\_30C\_Glu (Y axis).  $R=0.92$ .

**C.** Reproducibility of fitness measurements among high-coverage variants. The mean and standard deviation of log fitness are shown for 824 variants with at least two measurements with 1000 or more reads in population G0 among datasets Small\_1\_30C\_Glu and Small\_3\_30C\_Glu.

**Supplementary Figure 4.** Effects of mutations on folding energy.

**A.** Nomenclature of stems in the secondary structure of U3. Yeast-specific regions are shown in blue, regions conserved among Eukaryotes are in red.

**B.** The mean fitness of U3 variants binned by ascending minimal folding energy, calculated separately for each stem and for hinge-pre-rRNA hybrids. Bin ranges (from left to right, for stems I, II and VI): bin 1,  $\Delta\Delta G < 0$ ; bin 2,  $\Delta\Delta G = 0$ ; bin 3,  $0 < \Delta\Delta G < 1$ ; bin 4,  $1 < \Delta\Delta G < 2$ ; bin 5,

$2 < \Delta\Delta G < 3$ ; bin 6,  $\Delta\Delta G > 3$ ; for stems III, IV, V, 5' hinge and 3' hinge: bin 1,  $\Delta\Delta G < 0$ ; bin 2,  $\Delta\Delta G = 0$ ; bin 3,  $0 < \Delta\Delta G < 2$ ; bin 4,  $2 < \Delta\Delta G < 4$ ; bin 5,  $4 < \Delta\Delta G < 6$ ; bin 6,  $\Delta\Delta G > 6$ .  $\Delta\Delta G$  is the folding energy of the focal mutant minus the folding energy of the wild-type variant.

### **Supplementary Figure 5. Examples of fitness effects at specific sites.**

Fitness effects of each type of mutation (substitutions to A, C, G, T and deletion) at position U191 (A) and positions in terminal stem (B- D).

### **Supplementary Figure 6. Comparison of fitness effects in 30C and 37C.**

**A-C**, Distribution of  $p_i$ , the aggregate log fitness effect of position  $i$  across all genetic backgrounds, mapped to the U3 structure for individual experiments: Small\_1\_30C\_Glu (**A**), Small\_3\_30C\_Glu (**B**), and Small\_2\_37C\_Glu (**C**). Arrows indicate positions in which the fitness effects were most different between 30C and 37C.

**D-F**, Scatter plots of  $p_i$  values between pairs of individual experiments.

### **Supplementary Figure 7. Alternative calculation of the fitness effects of mutations.**

The aggregate log fitness effect of each position in experiment Small\_1\_30C\_Glu was calculated as in Fig. S6, except that the median fitness effect of mutations was used instead of the mean, to correct for effects of outliers.

### **Supplementary Figure 8. Systematic bias of $w_i$ estimated by ridge regression.**

**A-C**, Comparison of single-site effects estimated directly from single mutants (X axis,  $f_i$ ) and estimated by ridge regression (Y axis,  $w_i$ ). (A,D), mean of Small\_1\_30C\_Glu and Small\_3\_30C\_Glu; (B,E), Small\_2\_37C\_Glu; (C,F) Big\_1\_30C\_Glu.

**D-F**, Bias in single-site effects estimated by ridge regression. Regression overestimates  $f_i$  for low-effect sites, and underestimates  $f_i$  for large-effect sites. To estimate the epistatic effects  $w_{ij}$

by ridge regression, we therefore used empirical estimates of single-site effects from variants mutated at one position only ( $f_i$ ).

**Supplementary Figure 9.** Maps of epistatic interactions calculated for individual datasets.

**A**, mean of Small\_1\_30C\_Glu and Small\_3\_30C\_Glu;

**B**, Small\_2\_37C\_Glu

**C**, Big\_1\_30C\_Glu

**Supplementary Figure 10. Prediction of U3 secondary structure using constraints from positive epistasis.**

**A**, Map of known basepairing contacts (top left), and of contacts inferred from filtered positive epistatic interactions (bottom right, see Methods). Known contacts are circled.

**B**, Minimum Folding Energy (MFE) secondary structure predicted by Vienna using U3 sequence data alone.

**C**, MFE structure predicted by Vienna using U3 sequence and the following basepairing constraints: 330-77 (epistasis score=0.30, epistasis rank=2), 331-76 (score=0.30, rank=3), 332-75 (score=0.23, rank=4), 50-60 (score=0.23, rank=5), 49-61 (score=0.22, rank=6). This structure is markedly more similar to the known structure than structure predicted from sequence alone. In particular, the terminal stem and Stem 2 are now correctly folded. Using centroid instead of MFE structures led to similar results.

**Supplementary Figure 11. Cluster of negative epistatic interactions in the 3' hinge.**

**A**, Enrichment in negative epistatic interactions in the “3' hinge” (positions 62-73), which mediates basepairing of U3 with pre-rRNA.

**B**, The mean fitness (left axis) and U3-pre-rRNA interaction energy (right axis) of mutants binned by numbers of mutations in the 3' hinge.

**Supplementary Table 1. List of experiments.**

| Experiment name | Sample ID* | Time (h)† | Number of reads used | Number of barcodes recognised | Number of mutants accepted |
|-----------------|------------|-----------|----------------------|-------------------------------|----------------------------|
| Small_1_30C_Glu | total      |           | 76505765             | 41617                         | 22372                      |
|                 | G0         | 0         | 14233050             |                               |                            |
|                 | D1.25      | 36        | 14051955             |                               |                            |
|                 | D2.25      | 60        | 11881307             |                               |                            |
|                 | D3.25      | 84        | 15850703             |                               |                            |
|                 | D4.25      | 108       | 20488750             |                               |                            |
| Small_2_37C_Glu | total      |           | 88384609             | 40250                         | 23915                      |
|                 | G0         | 0         | 14013114             |                               |                            |
|                 | D1.25      | 36        | 14338456             |                               |                            |
|                 | D2.25      | 60        | 14277184             |                               |                            |
|                 | D3.25      | 84        | 14327688             |                               |                            |
|                 | D4.25      | 108       | 14365043             |                               |                            |
|                 | D5.25      | 132       | 2699207              |                               |                            |
|                 | D6.25      | 156       | 14363917             |                               |                            |
| Small_3_30C_Glu | total      |           | 201446365            | 41266                         | 23163                      |
|                 | G0         | 0         | 28745264             |                               |                            |
|                 | D0.25      | 12        | 28843586             |                               |                            |
|                 | D0.75      | 24        | 28537727             |                               |                            |
|                 | D1.25      | 36        | 29034201             |                               |                            |
|                 | D2.25      | 60        | 28822264             |                               |                            |
|                 | D3.25      | 84        | 28646717             |                               |                            |
|                 | D4.25      | 108       | 28816606             |                               |                            |
| Small_3_30C_Gal | total      |           | 165773130            | 41509                         | 23167                      |
|                 | G0         | 0         | 28745264             |                               |                            |
|                 | G0.25      | 12        | 21662238             |                               |                            |
|                 | G1.25      | 36        | 28813189             |                               |                            |
|                 | G2.25      | 60        | 28856414             |                               |                            |
|                 | G3.25      | 84        | 28866443             |                               |                            |
|                 | G4.25      | 108       | 28829582             |                               |                            |
| Big_1_30C_Glu   | total      |           | 13622683             | 67069                         | 36692                      |
|                 | G0         | 0         | 3488092              |                               |                            |
|                 | D0.25      | 12        | 2629826              |                               |                            |
|                 | D0.75      | 24        | 3083151              |                               |                            |
|                 | D1.25      | 36        | 4421614              |                               |                            |

\*The Sample ID represents the growth medium (G for galactose, D for glucose), and the duration of selection (in days) that was assumed for that sample in the fitness estimation. For example D1.25 represents a sample that was under selection on glucose for 1.25 days (30 hours). There is a 6-hour difference between the selection time and wall-clock time, because it took approximately 6 hours for genomically encoded U3 to be depleted after addition of glucose.

†Wall-clock time when sample was taken.

**Supplementary Table 2. Sequences of oligonucleotides.**

| Name      | Sequence                                                                                                                                                                                                                                                                                                                                                                                                                                                                                                                                                                                                                                                                                                                                                                                                                                                                                                                    |
|-----------|-----------------------------------------------------------------------------------------------------------------------------------------------------------------------------------------------------------------------------------------------------------------------------------------------------------------------------------------------------------------------------------------------------------------------------------------------------------------------------------------------------------------------------------------------------------------------------------------------------------------------------------------------------------------------------------------------------------------------------------------------------------------------------------------------------------------------------------------------------------------------------------------------------------------------------|
| U3_1F_wt  | CTTAAAATCTGTGTCGACGACTTCATAGGATCATTCTATAG<br>GAATCGTCACTCTTTGACTCTTCAAAGAGCCACTGAATCCA<br>ACTTGGTTGATGAGT                                                                                                                                                                                                                                                                                                                                                                                                                                                                                                                                                                                                                                                                                                                                                                                                                   |
| U3_1R_wt  | ATTGCGGACCAAGCTAATTTAGATTCAATTTTCGGTTTCTCACT<br>CTGGGGTACAAAGGTTATGGGACTCATCAACCAAGTTGGA                                                                                                                                                                                                                                                                                                                                                                                                                                                                                                                                                                                                                                                                                                                                                                                                                                    |
| U3_2F_wt  | AAATTAGCTTGGTCCGCAATCCTTAGCGGTTTCGGCCATCTATA<br>ATTTTGAATAAAAATTTTGCTTTGCCGTTGCATTTGTAGT                                                                                                                                                                                                                                                                                                                                                                                                                                                                                                                                                                                                                                                                                                                                                                                                                                    |
| U3_2R_wt  | AGTACATAGGATGGGTCAAGATCATCGCGCCATAAAATATTG<br>TAATTACTTCAAAGGAAAAAACTACAAATGCAACGGCAA                                                                                                                                                                                                                                                                                                                                                                                                                                                                                                                                                                                                                                                                                                                                                                                                                                       |
| U3_3F_wt  | CTTGACCCATCCTATGTACTTCTTTTTTTGAAGGGATAGGGCTC<br>TATGGGTGGGTACAAATGGCAGTCTGACAAGTTAACCAC                                                                                                                                                                                                                                                                                                                                                                                                                                                                                                                                                                                                                                                                                                                                                                                                                                     |
| U3_3R_wt  | TAATCCAATTTCTTAACTGAAAACCAAACCTTTGGTTTTAAAC<br>AATTTAGAAAAGGAAAAAAGTGGTTAACTTGTCAGACT                                                                                                                                                                                                                                                                                                                                                                                                                                                                                                                                                                                                                                                                                                                                                                                                                                       |
| U3_1F_mut | CTTAAAATCTGTGTCGACG(01019701)(01010197)(97010101)(019<br>70101)(01010197)(01010197)(01970101)(97010101)(01010197)(97010<br>101)(01019701)(01019701)(97010101)(01010197)(01970101)(9701010<br>1)(01010197)(01010197)(01010197)(01970101)(01010197)(97010101)<br>(01010197)(97010101)(01019701)(01019701)(97010101)(97010101)(0<br>1010197)(01970101)(01019701)(01010197)(01970101)(97010101)(019<br>70101)(01010197)(01970101)(01010197)(01010197)(01010197)(01019<br>701)(97010101)(01970101)(01010197)(01970101)(01010197)(0101019<br>7)(01970101)(97010101)(97010101)(97010101)(97010101)(01019701)<br>(97010101)(01019701)(01970101)(01970101)(97010101)(01970101)(0<br>1010197)(01019701)(97010101)(97010101)(01010197)(01970101)(019<br>70101)(97010101)(97010101)(01970101)(01010197)(01010197)(01019<br>701)(01019701)(01010197)(01010197)(01019701)(97010101)(0101019<br>7)(01019701)(97010101)(01019701)(01010197) |
| U3_1R_mut | (97010101)(01010197)(01010197)(01019701)(01970101)(01019701)(0<br>1019701)(97010101)(01970101)(01970101)(97010101)(97010101)(010<br>19701)(01970101)(01010197)(97010101)(97010101)(01010197)(01010<br>197)(01010197)(97010101)(01019701)(97010101)(01010197)(0101019<br>7)(01970101)(97010101)(97010101)(01010197)(01010197)(01010197)<br>(01970101)(01019701)(01019701)(01010197)(01010197)(01010197)(0<br>1970101)(01010197)(01970101)(97010101)(01970101)(01010197)(019<br>70101)(01010197)(01019701)(01019701)(01019701)(01019701)(01010<br>197)(97010101)(01970101)(97010101)(97010101)(97010101)(0101970                                                                                                                                                                                                                                                                                                              |

|           |                                                                                                                                                                                                                                                                                                                                                                                                                                                                                                                                                                                                                                                                                                                                                                                                                                                                          |
|-----------|--------------------------------------------------------------------------------------------------------------------------------------------------------------------------------------------------------------------------------------------------------------------------------------------------------------------------------------------------------------------------------------------------------------------------------------------------------------------------------------------------------------------------------------------------------------------------------------------------------------------------------------------------------------------------------------------------------------------------------------------------------------------------------------------------------------------------------------------------------------------------|
|           | 1)(01019701)(01010197)(01010197)(97010101)(01010197)(01019701)<br>(01019701)(01019701)(97010101)(01970101)(01010197)(01970101)(97010101)(01010197)(01970101)(97010101)(97010101)(01970101)(01970101)(97010101)(97010101)(01019701)(01010197)(01010197)(01019701)(01019701)(97010101)                                                                                                                                                                                                                                                                                                                                                                                                                                                                                                                                                                                     |
| U3_2F_mut | (97010101)(97010101)(97010101)(01010197)(01010197)(97010101)(01019701)(01970101)(01010197)(01010197)(01019701)(01019701)(01010197)(01970101)(01970101)(01019701)(01970101)(97010101)(97010101)(01010197)(01970101)(01970101)(01010197)(01010197)(97010101)(01019701)(01970101)(01019701)(01019701)(01010197)(01010197)(01970101)(01019701)(01019701)(01970101)(01970101)(97010101)(01010197)(01970101)(01010197)(97010101)(01010197)(97010101)(97010101)(97010101)(97010101)(97010101)(01010197)(01010197)(01010197)(01010197)(01010197)(01019701)(01970101)(01970101)(01010197)(01010197)(01010197)(01019701)(01970101)(01970101)(01019701)(01010197)(01010197)(01019701)(01010197)(97010101)(01019701)(01010197)                                                                                                                                                       |
| U3_2R_mut | (97010101)(01019701)(01010197)(97010101)(01970101)(97010101)(01010197)(97010101)(01019701)(01019701)(01010197)(01019701)(01019701)(01019701)(01010197)(01970101)(97010101)(97010101)(01019701)(97010101)(01010197)(01970101)(97010101)(01010197)(01970101)(01970101)(01970101)(01970101)(01010197)(97010101)(97010101)(97010101)(97010101)(97010101)(01010197)(97010101)(01010197)(01010197)(01019701)(01010197)(97010101)(97010101)(01010197)(01010197)(97010101)(01970101)(01010197)(01010197)(01970101)(01970101)(97010101)(01010197)(97010101)(97010101)(97010101)(97010101)(97010101)(97010101)(01970101)(01010197)(97010101)(01970101)(97010101)(97010101)(97010101)(97010101)(97010101)(01970101)(97010101)(97010101)(01010197)(01019701)(01970101)(97010101)(97010101)(01970101)(01019701)(01019701)(01970101)(01019701)(01970101)(97010101)(97010101)(97010101) |
| U3_3F_mut | (01970101)(01010197)(01010197)(01019701)(97010101)(01970101)(01970101)(01970101)(97010101)(01010197)(01970101)(01970101)(01010197)(97010101)(01010197)(01019701)(01010197)(97010101)(01970101)(01010197)(01010197)(01970101)(01010197)(01010197)(01010197)(01019701)(97010101)(97010101)(01019701)(01019701)(01019701)(97010101)(01010197)(97010101)(01019701)(01019701)(01970101)(01010197)(01970101)(01010197)(97010101)(01010197)(01019701)(01019701)(01019701)(01010197)(01970101)(01010197)(01019701)(01019701)(01019701)(01010197)(97010101)(01970101)(01970101)(97010101)(97010101)(01010197)(01019701)(01019701)(01970101)(01970101)(97010101)(97010101)(97010101)(01010197)(01019701)(01019701)(01970101)(97010101)(97010101)(97010101)                                                                                                                         |

|                    |                                                                                                                                                                                               |
|--------------------|-----------------------------------------------------------------------------------------------------------------------------------------------------------------------------------------------|
|                    | 1019701)(97010101)(01970101)(97010101)(97010101)(01019701)(01010197)(01010197)(97010101)(97010101)(01970101)(01970101)(97010101)(01970101)                                                    |
| U3_3R_mut          | TAATCCAATTTCTTAACTGAAAACCAAACCTTTGGTTTTAAACAATTTAGAAAAGGAAAAAAGTGGTTA(97010101)(01970101)(01010197)(01010197)(01019701)(01010197)(01970101)(97010101)(01019701)(97010101)(01970101)(01010197) |
| U3_end_bar_EcoR1   | ACGTACGNNNNNNNNNNNNNNNNNNNTAATCCAATTTCTTAACTGA                                                                                                                                                |
| U3_start Sall      | TTAAAATCTGTGTCGACG                                                                                                                                                                            |
| EcoRI_oligo_Sall   | ACGTACGTGAATTCACGTACGTACGTACGTGTCGACACGTACGT                                                                                                                                                  |
| Sall_oligo_EcoRI   | ACGTACGTGTCGACACGTACGTACGTACGTGAATTCACGTACGT                                                                                                                                                  |
| Index1_PCR_U3_seq  | CAAGCAGAAGACGGCATAACGAGATATCATGAGTCAGTCAGCCTGTTTCTACTTAAAATCTGT                                                                                                                               |
| Index2_PCR_U3_seq  | CAAGCAGAAGACGGCATAACGAGATCAAGTTAGTCAGTCAGCCTGTTTCTACTTAAAATCTGT                                                                                                                               |
| R_PCR_U3bar_seq    | AATGATACGGCGACCACCGAGATCTACACTATGGTAATTGTAACGACGGCCAGTGAATTC                                                                                                                                  |
| Index1_PCR_bar_seq | CAAGCAGAAGACGGCATAACGAGATCGTGATGTGACTGGAGTTCAGACGTGTGCTCTTCCGATCTTTTCAGTTAAGAAATTGG                                                                                                           |
| Index2_PCR_bar_seq | CAAGCAGAAGACGGCATAACGAGATACATCGGTGACTGGAGTTCAGACGTGTGCTCTTCCGATCTTTTCAGTTAAGAAATTGG                                                                                                           |
| Index3_PCR_bar_seq | CAAGCAGAAGACGGCATAACGAGATGCCTAAGTGACTGGAGTTCAGACGTGTGCTCTTCCGATCTTTTCAGTTAAGAAATTGG                                                                                                           |
| Index4_PCR_bar_seq | CAAGCAGAAGACGGCATAACGAGATTGGTCAGTGACTGGAGTTCAGACGTGTGCTCTTCCGATCTTTTCAGTTAAGAAATTGG                                                                                                           |
| Index5_PCR_bar_seq | CAAGCAGAAGACGGCATAACGAGATCACTGTGTGACTGGAGTTCAGACGTGTGCTCTTCCGATCTTTTCAGTTAAGAAATTGG                                                                                                           |
| Index6_PCR_bar_seq | CAAGCAGAAGACGGCATAACGAGATATTGGCGTGACTGGAGTTCAGACGTGTGCTCTTCCGATCTTTTCAGTTAAGAAATTGG                                                                                                           |
| Custom_Read1_seq_p | TATGGTAATTGTAAACGACGGCCAGTGAATTC                                                                                                                                                              |

|                           |                                                     |
|---------------------------|-----------------------------------------------------|
| rimer_U3                  |                                                     |
| Proton_A_PCR_bar_seq_F    | CCATCTCATCCCTGCGTGTCTCCGACTCAGGTTTTTCAGTTAAGAAATTGG |
| Proton_A_PCR_bar_seq_R    | CCATCTCATCCCTGCGTGTCTCCGACTCAGTTGTAAAACGACGGCCAGTG  |
| Proton_trP1_PCR_bar_seq_F | CCTCTCTATGGGCAGTCGGTGATGTTTTTCAGTTAAGAAATTGG        |
| Proton_trP1_PCR_bar_seq_R | CCTCTCTATGGGCAGTCGGTGATTTGTAAAACGACGGCCAGTG         |



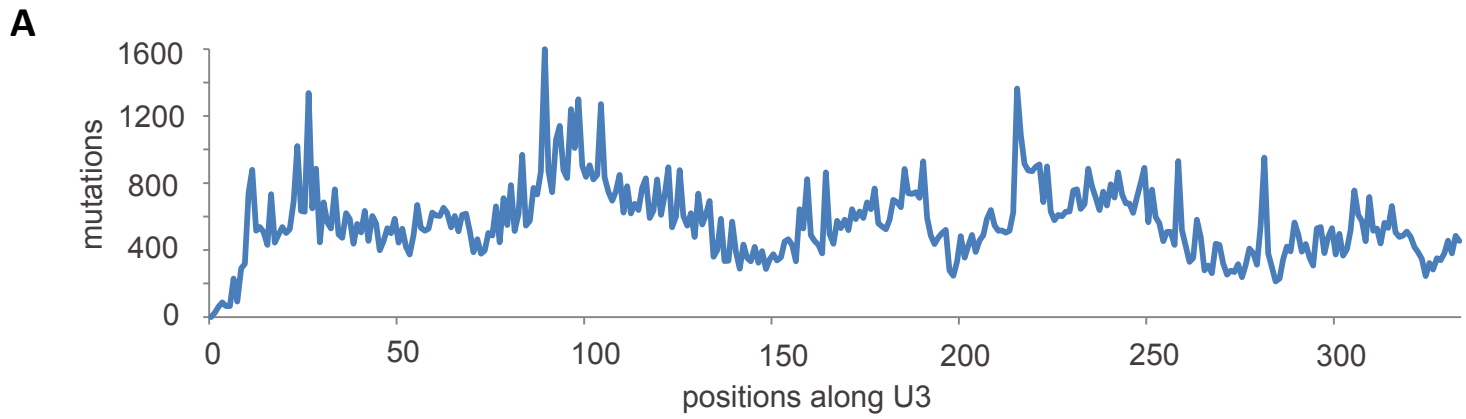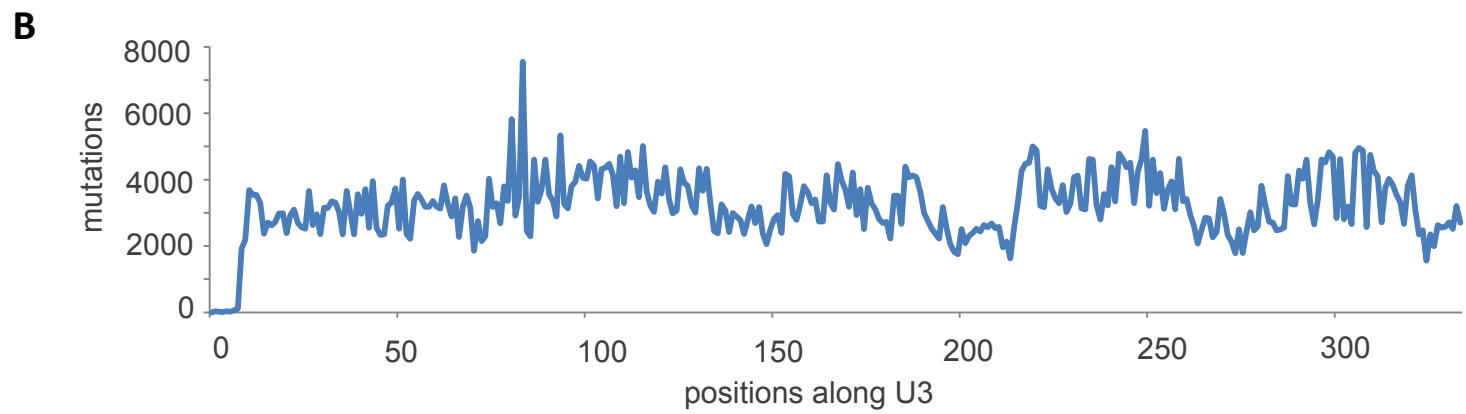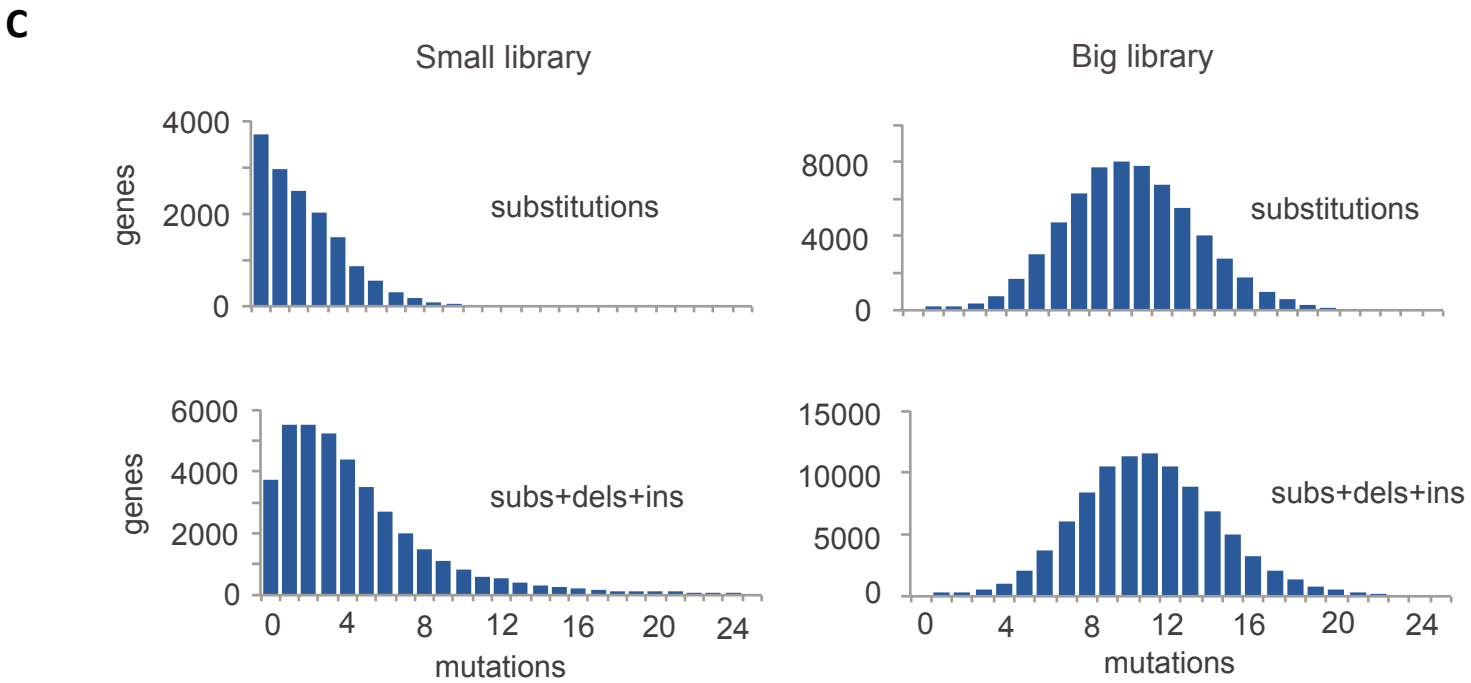

**Supplementary Figure 1**  
Puchta et al.

**Glucose**

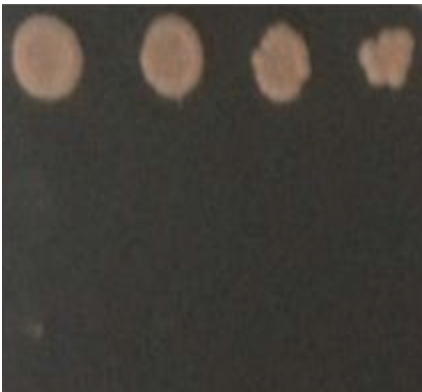

wild type U3

empty plasmid

non-functional mutant

**Galactose**

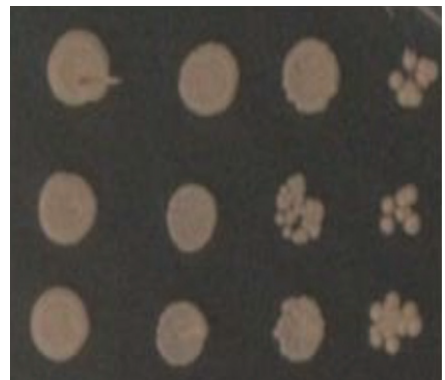

**Supplementary Figure 2**  
Puchta et al.

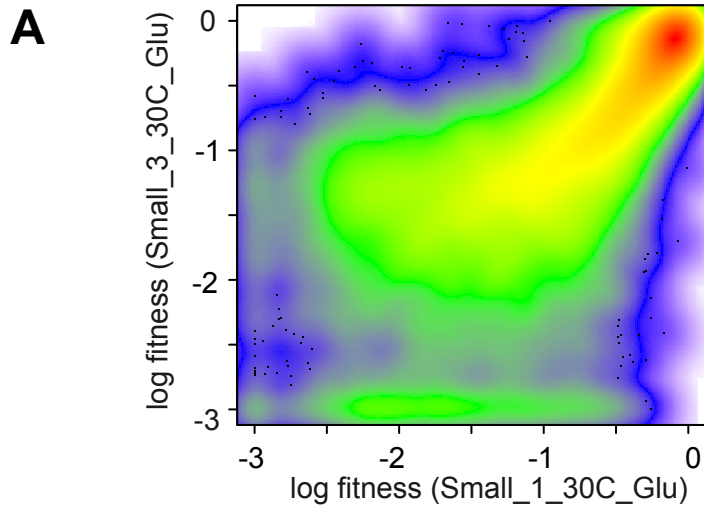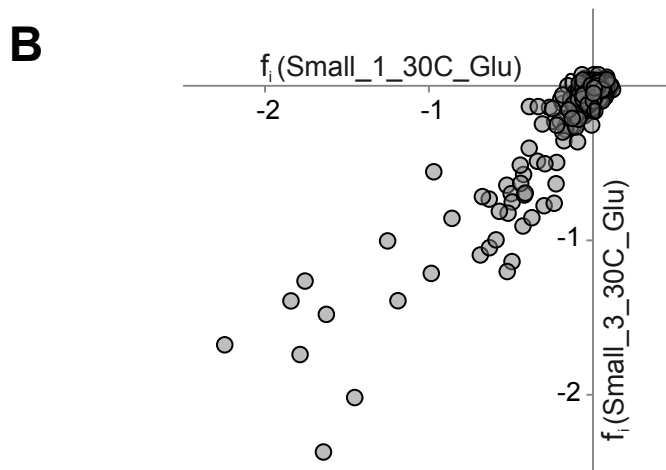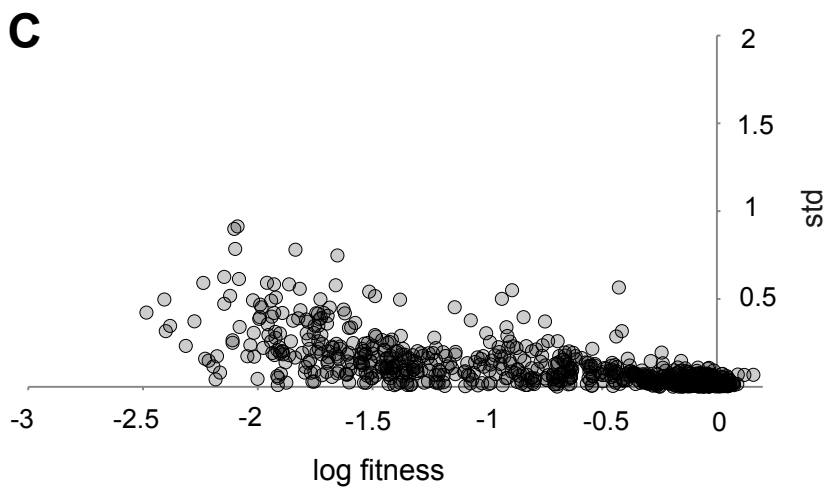

**Supplementary Figure 3**  
Puchta et al.

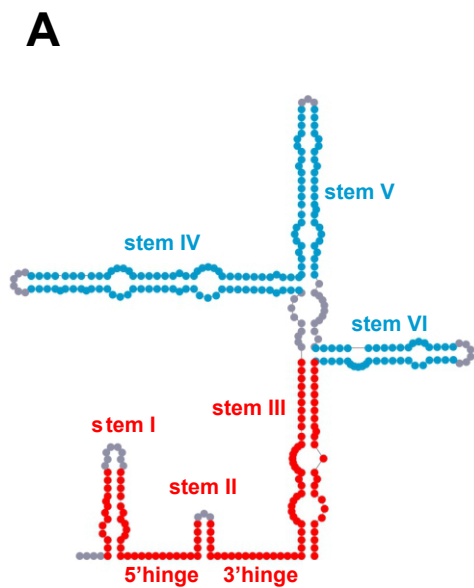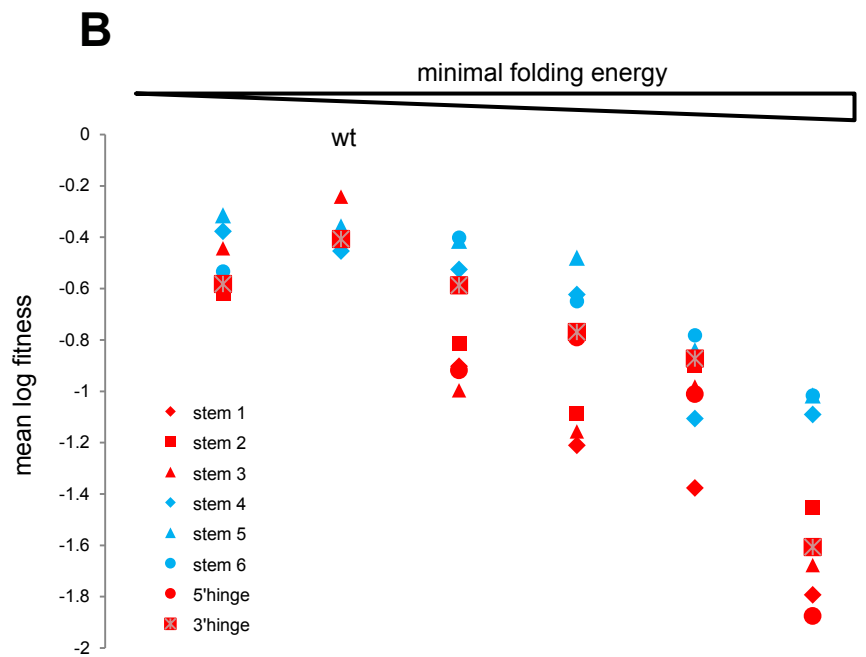

**Supplementary Figure 4**  
Puchta et al.

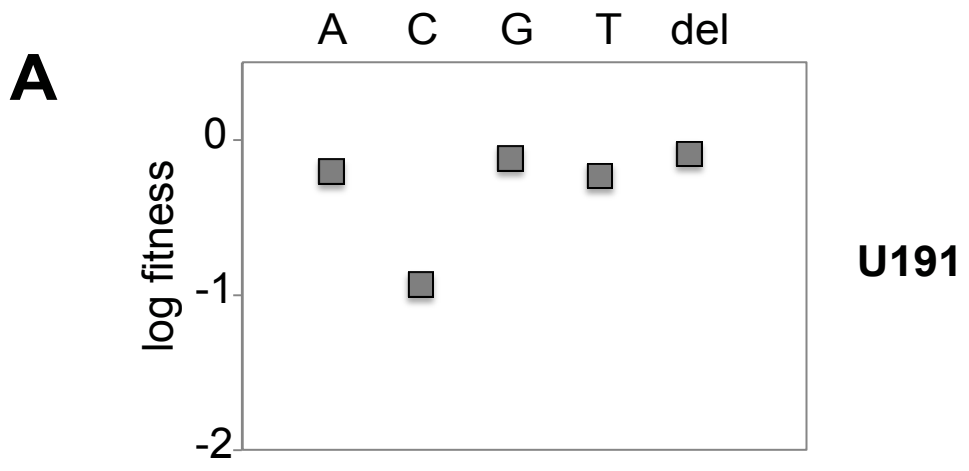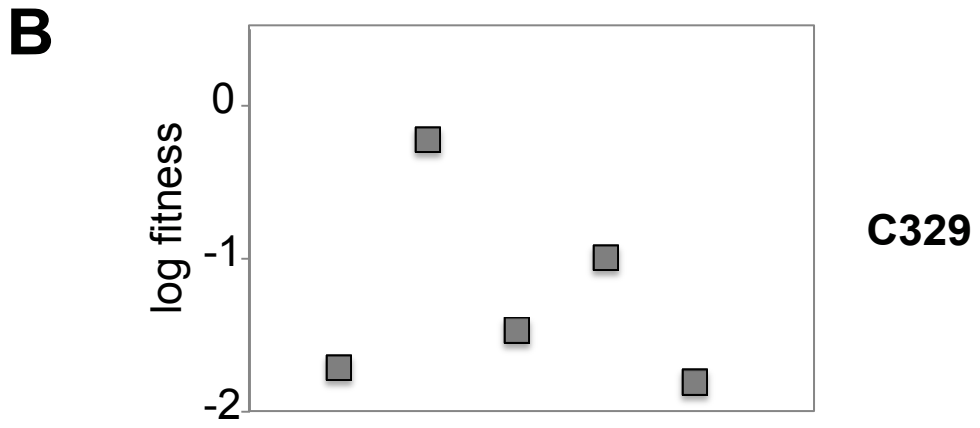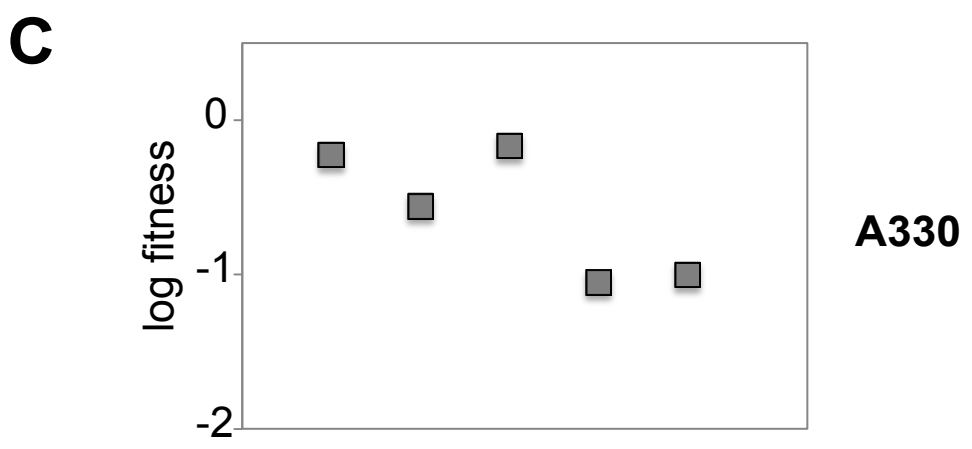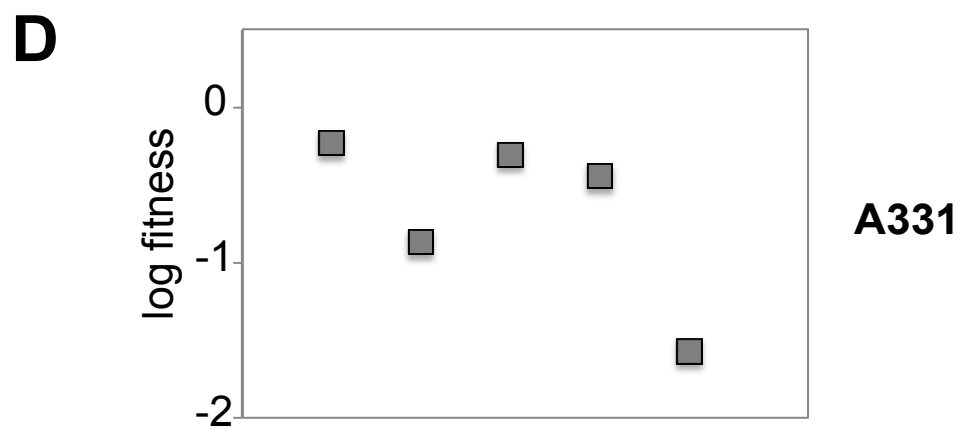

**Supplementary Figure 5**  
Puchta et al.

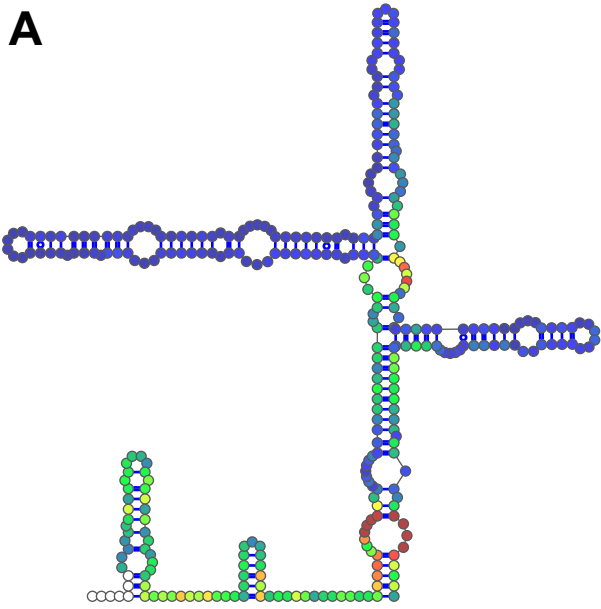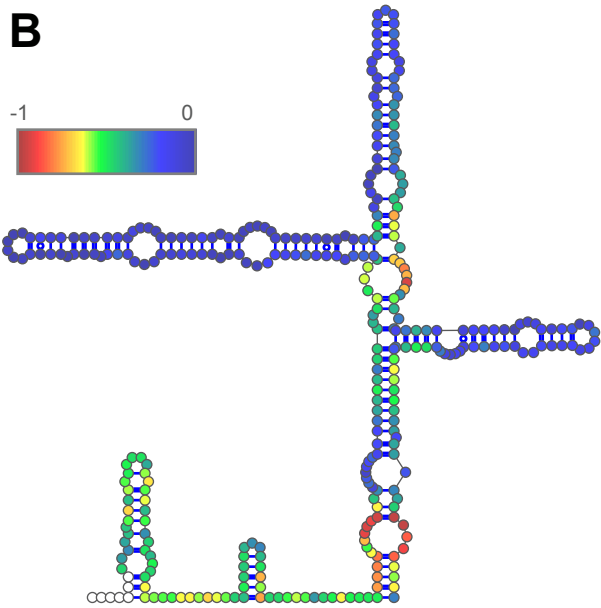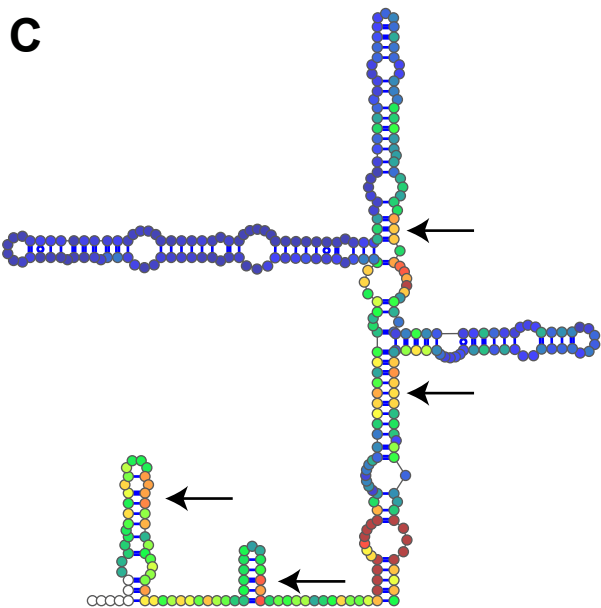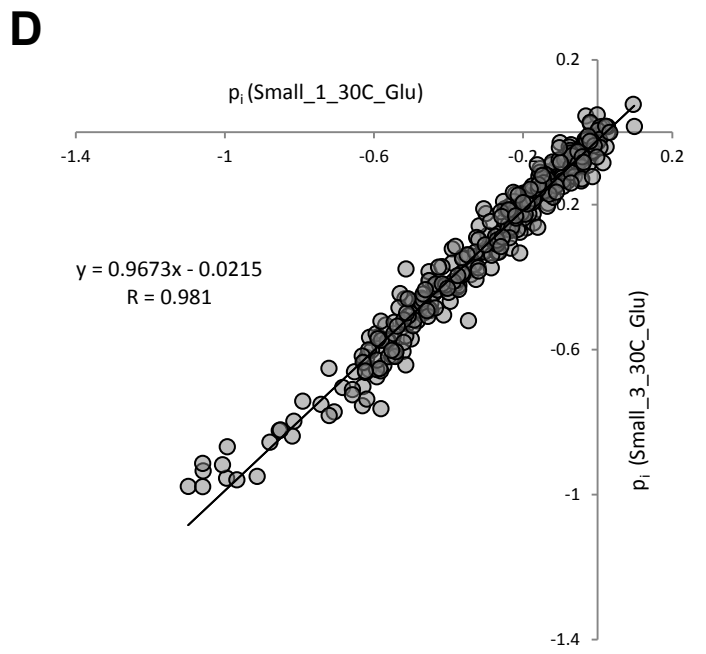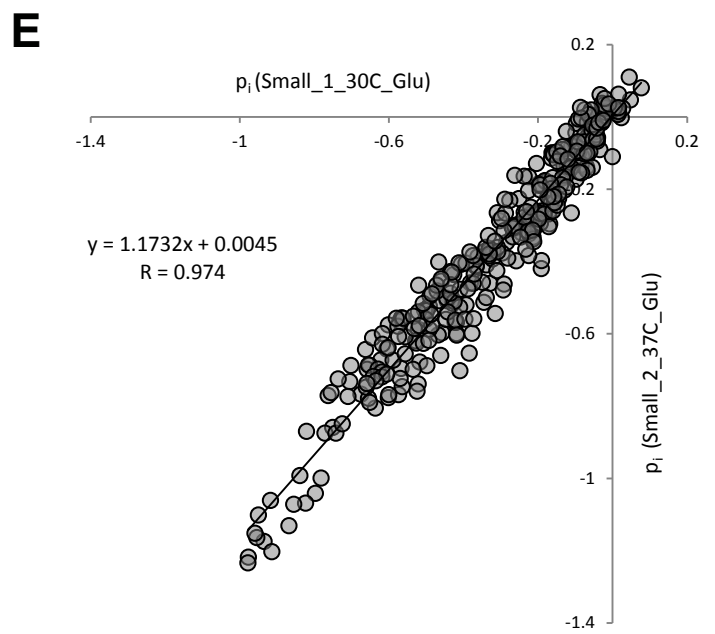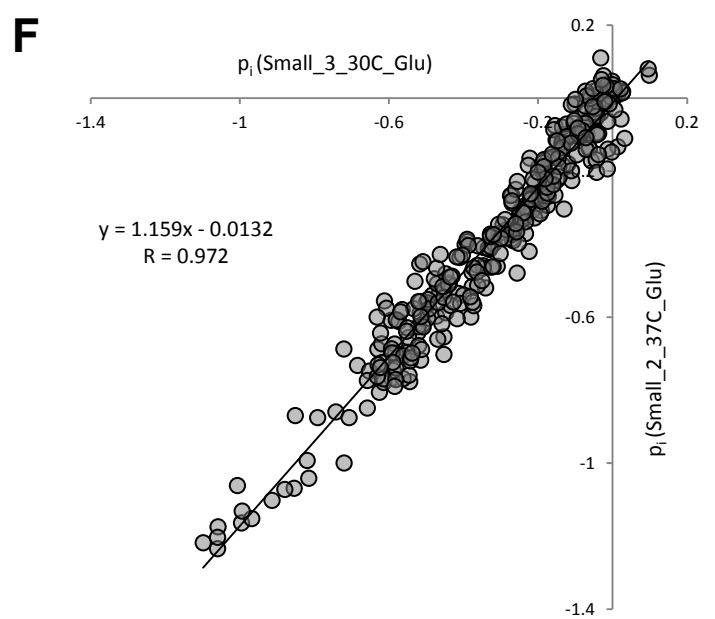

**Supplementary Figure 6**  
Puchta et al.

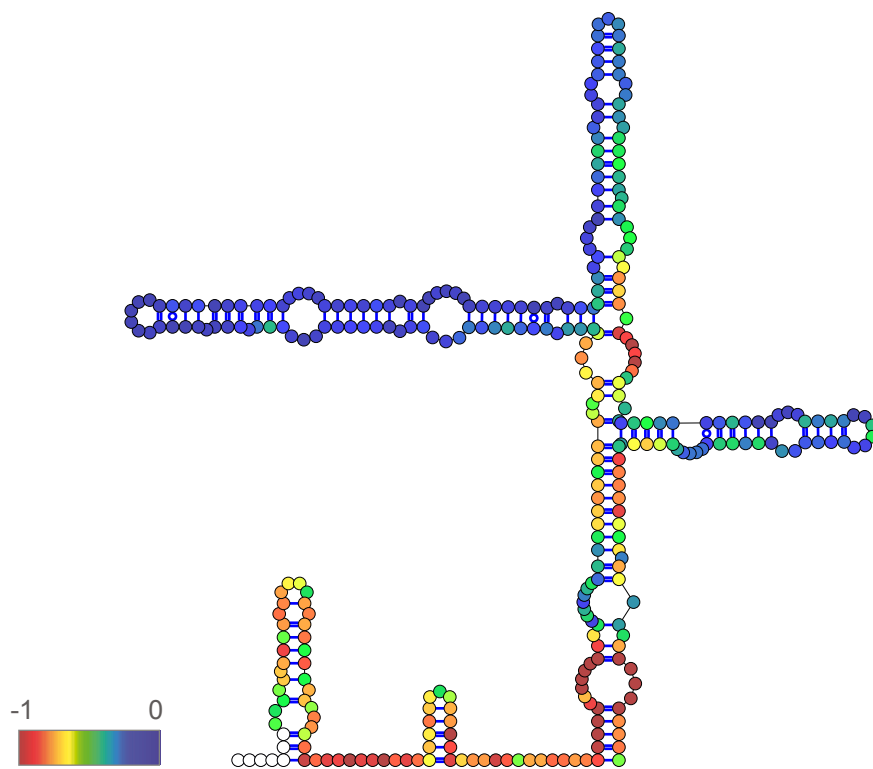

**Supplementary Figure 7**  
Puchta et al.

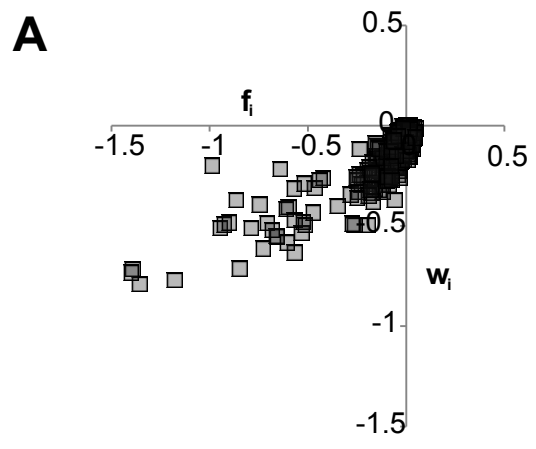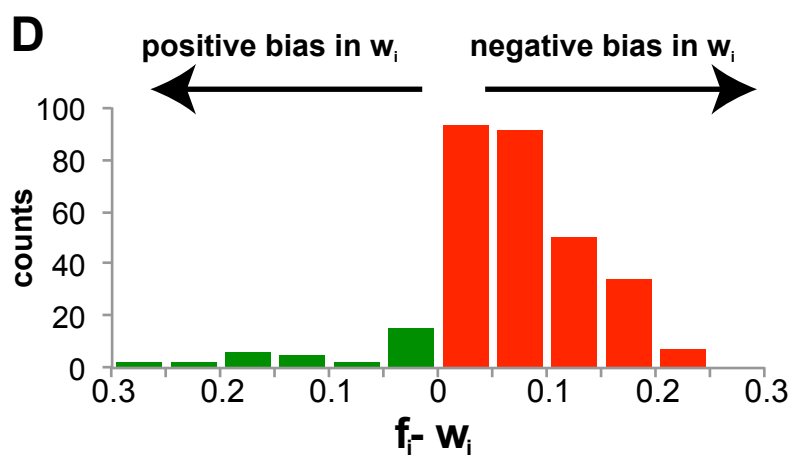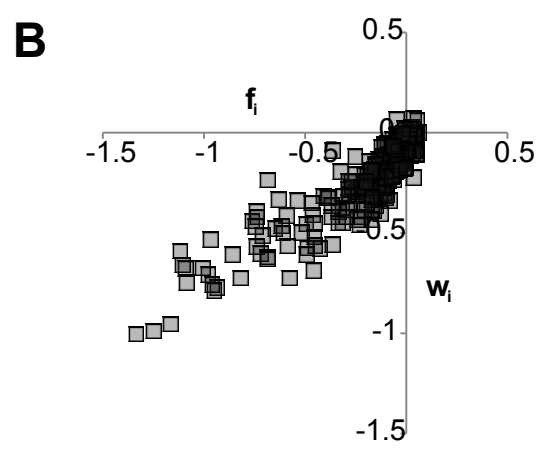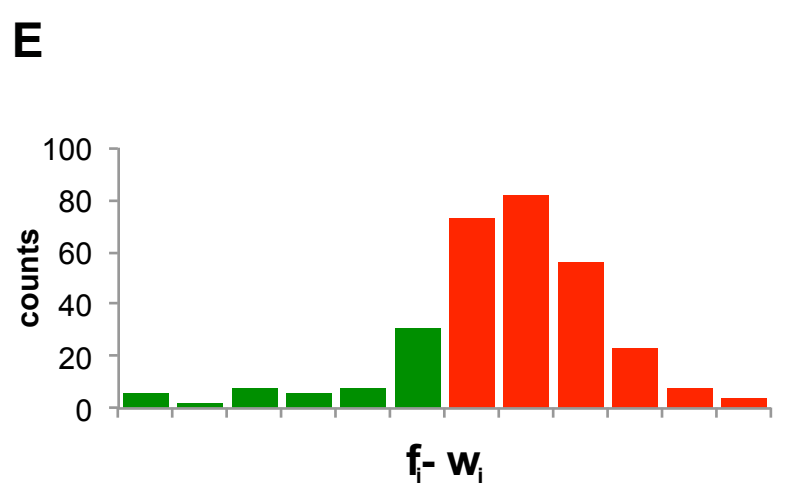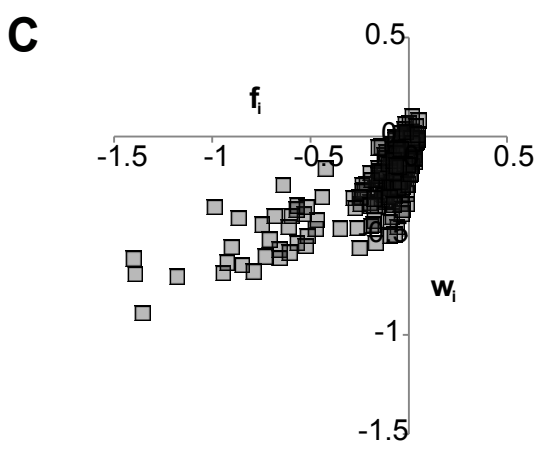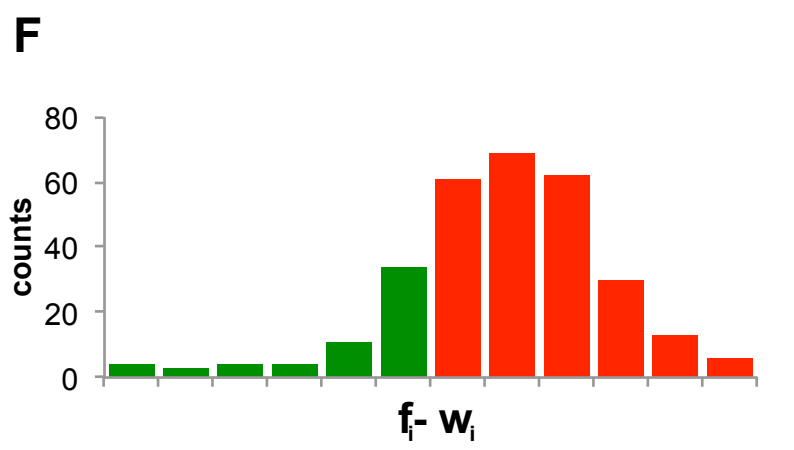

**Supplementary Figure 8**  
Puchta et al.



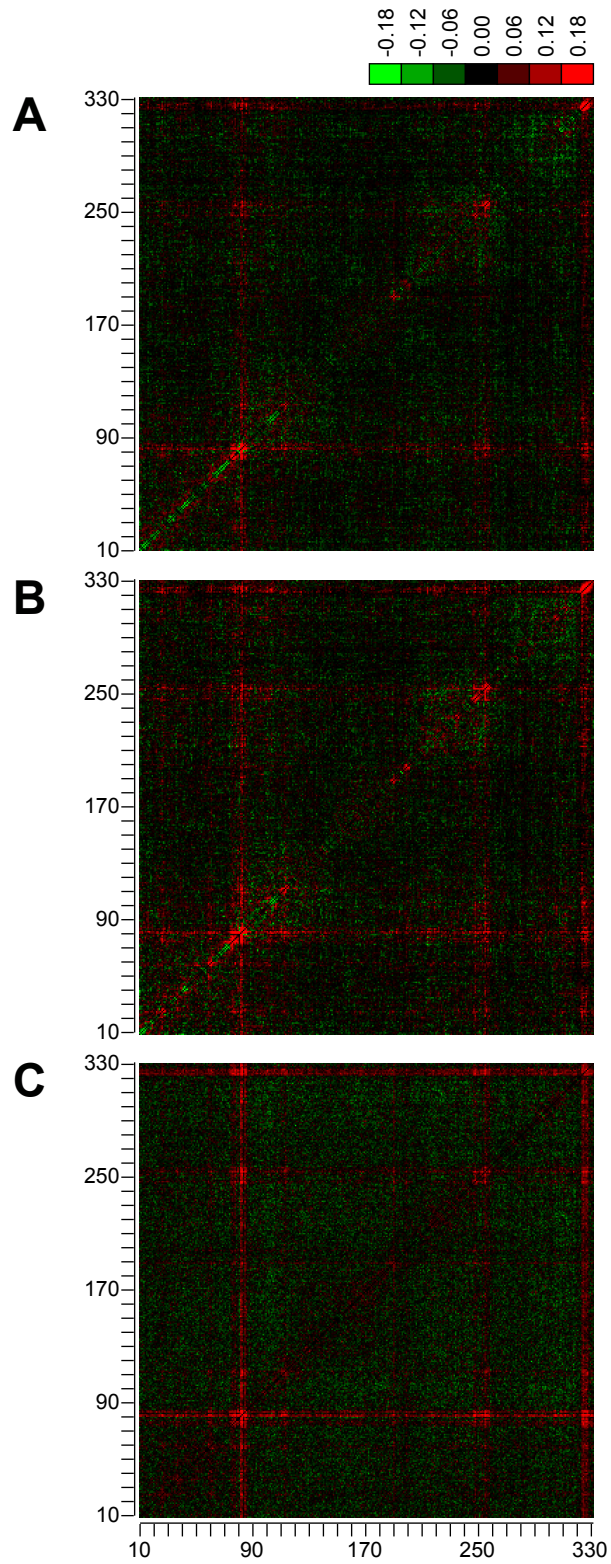

**Supplementary Figure 9**  
Puchta et al.

**A**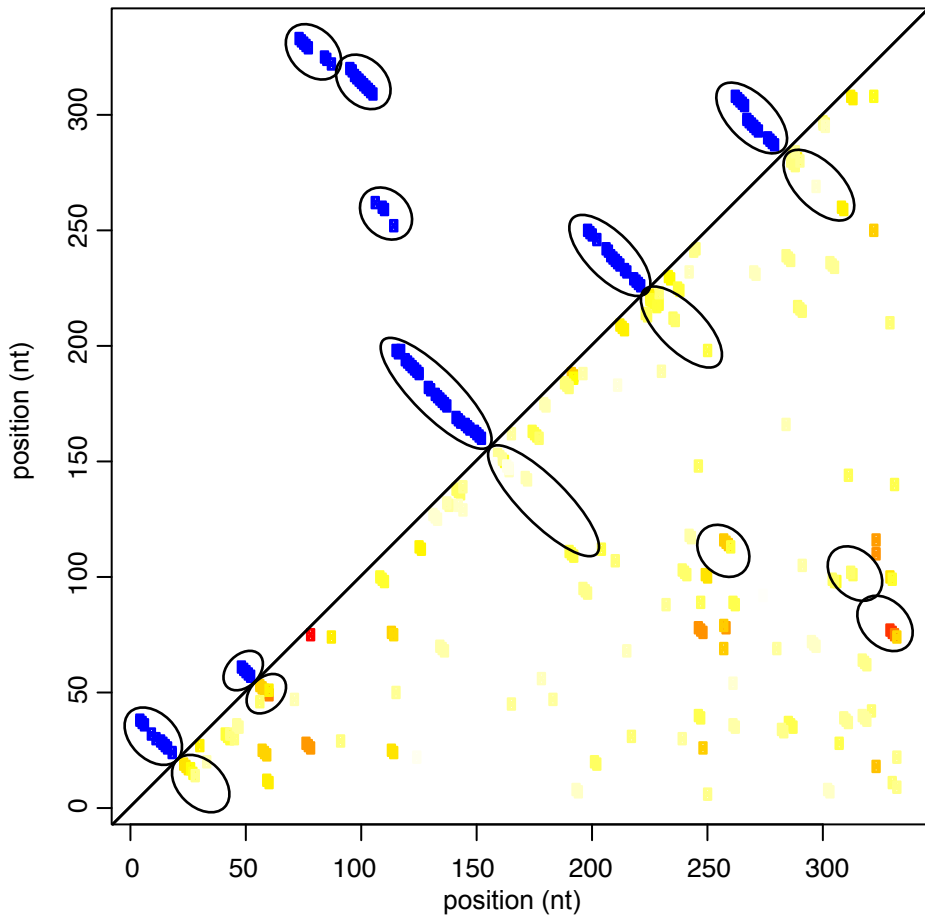**B**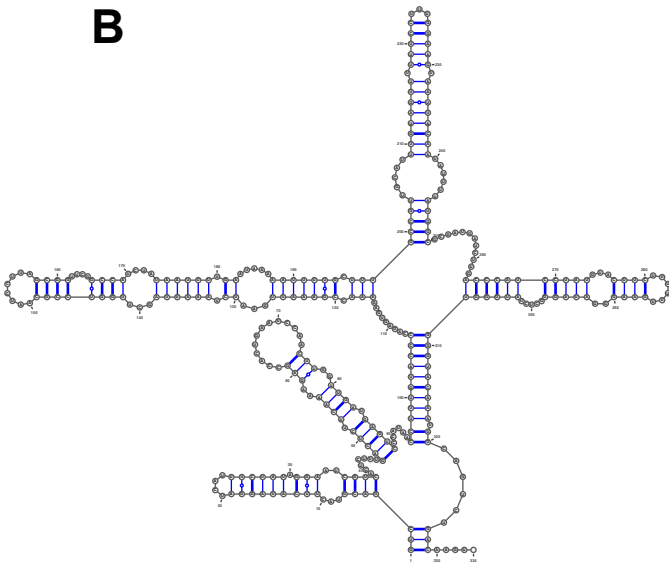**C**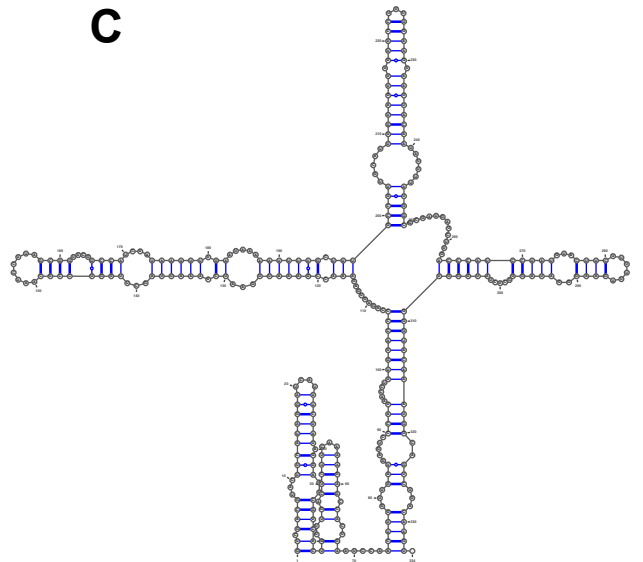

**Supplementary Figure 10**  
Puchta et al.

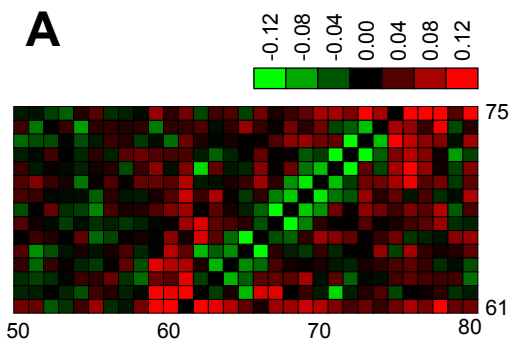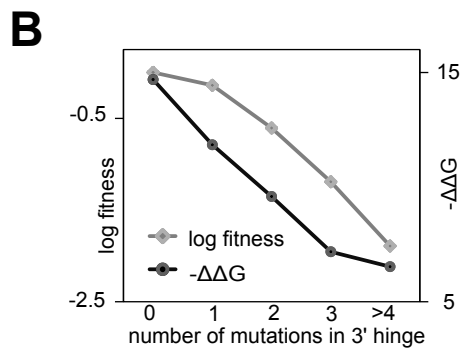

**Supplementary Figure 11**  
Puchta et al.
